# Supplementary material
Source: PubMed Central journal article supplement (PMC6014544)
Supplement: DC171376SupplementaryData.pdf [file DC171376SupplementaryData.pdf]

## SUPPLEMENTARY DATA

**Supplementary Table S1. Primary data sources used in the Disease Expenditure project for diabetes spending**

| Type of care                             | Macro spending data and years | Micro spending data and years                                                                                                                                        | Micro volume data and years                                                                                                                      |
|------------------------------------------|-------------------------------|----------------------------------------------------------------------------------------------------------------------------------------------------------------------|--------------------------------------------------------------------------------------------------------------------------------------------------|
| <b>Ambulatory</b>                        | NHEA (1996 – 2013)*           | MEPS (1996 – 2013); SAMHSA (1998, 2002, 2004, 2005, 2009); MarketScan (2000, 2010, 2012)                                                                             | NAMCS (1996 – 2011); NHAMCS (1996 – 2011); MarketScan (2000, 2010, 2012)                                                                         |
| <b>Inpatient</b>                         | NHEA (1996 – 2013)            | NIS (1996 – 2012); MEPS (1996 – 2013), SAMHSA (1998, 2002, 2004, 2005, 2009); MarketScan (2000, 2010, 2012)                                                          | NIS (1996 – 2012); MarketScan (2000, 2010, 2012)                                                                                                 |
| <b>Emergency Department</b>              | NHEA (1996 – 2013)*           | MEPS (1996 – 2013); MarketScan (2000, 2010, 2012)                                                                                                                    | NHAMCS (1996 – 2011); MarketScan (2000, 2010, 2012)                                                                                              |
| <b>Nursing care</b>                      | NHEA (1996 – 2013)            | Medicare claims data (1999 – 2001, 2002, 2004, 2006, 2008, 2010, 2012); NNHS (1997, 1999, 2004); MCBS (1999-2011); MarketScan (2000, 2010, 2012), MCBS (1999 – 2011) | Medicare claims data (1999 – 2001, 2002, 2004, 2006, 2008, 2010, 2012); NNHS (1997, 1999, 2004); MCBS (1999-2011); MarketScan (2000, 2010, 2012) |
| <b>Prescribed retail pharmaceuticals</b> | NHEA (1996 – 2013)            | MEPS (1996 – 2013)                                                                                                                                                   | MEPS (1996 – 2013)                                                                                                                               |
